# Supplementary material for: Isolation and identification of ubiquitin-related proteins from Arabidopsis seedlings
Source: PubMed Central journal article supplement — J Exp Bot. 2009 May 8;60(11):3067–73. doi: 10.1093/jxb/erp134 (PMC2718211; doi:10.1093/jxb/erp134), 2009-05-08
Supplement: erp134_1.pdf [file erp134_1.pdf]

## **Isolation and identification of ubiquitin-related proteins from *Arabidopsis* seedlings**

Tomoko IGAWA<sup>1#</sup>, Masayuki FUJIWARA<sup>1</sup>, Hirotaka TAKAHASHI<sup>2</sup>, Tetsuya SAWASAKI<sup>2</sup>, Yaeta ENDO<sup>2</sup>, Motoaki SEKI<sup>3</sup>, Kazuo SHINOZAKI<sup>3</sup>, Yoichiro FUKAO<sup>1</sup> and Yuki YANAGAWA<sup>1#\*</sup>

### **Supplementary data**

**Figure S1.** Respective SDS-PAGE images of proteins immunopurified with FK2 obtained from three independent experiments (Ex1, Ex2, and Ex3). The staining pattern of the purified proteins was reproducible.

**Table S1.** Ub-related proteins identified from *Arabidopsis* seedlings.

**Table S2.** Proteins containing potential ubiquitination-targeting signal motifs for Ub/proteasome-dependent proteolysis.

Fig. S1

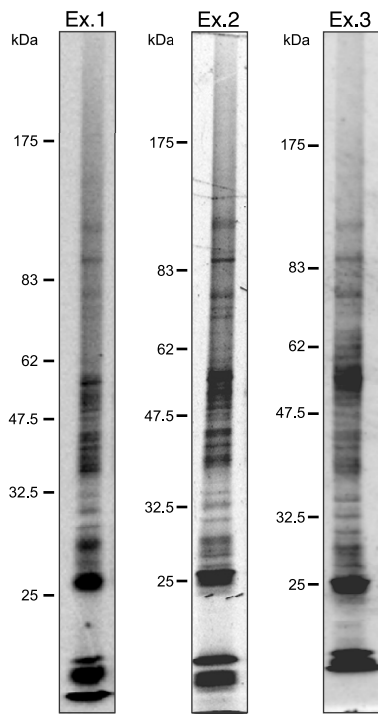

**Table S1** : Ub-related proteins identified from *Arabidopsis* seedlings.

| Protein number        | Score | At number              | Description                                                                                                  | Peptide sequence           | Charge state | Modification    | Gel pieces | Motifs |
|-----------------------|-------|------------------------|--------------------------------------------------------------------------------------------------------------|----------------------------|--------------|-----------------|------------|--------|
| <b>1<sup>a</sup></b>  | 325   | At1g13440<br>At3g04120 | GAPC-2; glyceraldehyde-3-phosphate dehydrogenase<br>GAPC; glyceraldehyde-3-phosphate dehydrogenase C subunit | K.LTGMSFR.V                | 2+           | Oxidation (M)   | 4          | -      |
|                       |       |                        |                                                                                                              | R.IGINGFGR.I               | 2+           |                 |            |        |
|                       |       |                        |                                                                                                              | R.AASFNIPSSSTGAAK.A        | 2+           |                 |            |        |
|                       |       |                        |                                                                                                              | K.TLLFGKEKPTVFGIR.N        | 3+           |                 |            |        |
|                       |       |                        |                                                                                                              | K.DAPMFVGVNEHEYK.S         | 3+           |                 |            |        |
|                       |       |                        |                                                                                                              | R.FGIVEGLMTTVHSITATQK.T    | 3+           |                 |            |        |
|                       |       |                        |                                                                                                              | K.GILGYTEDDVVSTDFVGDNR.S   | 3+           |                 |            |        |
| K.KVVISAPSK.D         | 2+    |                        |                                                                                                              |                            |              |                 |            |        |
| <b>2<sup>b</sup></b>  | 316   | At2g04030              | CR88 (EMBRYO DEFECTIVE 1956); ATP binding                                                                    | R.EETDPDNL.R               | 2+           | Oxidation (M)   | 1          | +      |
|                       |       |                        |                                                                                                              | R.ELVSNASDALDK.L           | 2+           |                 |            |        |
|                       |       |                        |                                                                                                              | K.SGETEVVEPSEVR.A          | 2+           |                 |            |        |
|                       |       |                        |                                                                                                              | K.GVVDSDDLPLNVS.R          | 2+           |                 |            |        |
|                       |       |                        |                                                                                                              | K.AQALGDTSSLEFMR.G         | 2+           |                 |            |        |
|                       |       |                        |                                                                                                              | R.TIEVEDEPVEKEGEEGEPK.K    | 3+           |                 |            |        |
|                       |       |                        |                                                                                                              | R.VLATLYEK.D               | 2+           |                 |            |        |
| K.VLFDSPRK.V          | 2+    |                        |                                                                                                              |                            |              |                 |            |        |
| <b>3</b>              | 292   | At2g47730              | Glutathione S-transferase 6, chloroplast precursor                                                           | K.DLQFELIPVDMR.A           | 2+           | Oxidation (M)   | 6          | +      |
|                       |       |                        |                                                                                                              | K.VLDVYEAR.L               | 2+           |                 |            |        |
|                       |       |                        |                                                                                                              | K.VHGVPMSSTATMR.V          | 3+           |                 |            |        |
|                       |       |                        |                                                                                                              | R.AITQYLAEYSEK.G           | 2+           |                 |            |        |
|                       |       |                        |                                                                                                              | K.GMFGMTTDPAAVQLEGK.L      | 3+           |                 |            |        |
|                       |       |                        |                                                                                                              | K.SEVLDFIR.S               | 2+           |                 |            |        |
|                       |       |                        |                                                                                                              | R.YLYPHFR.F                | 2+           |                 |            |        |
| <b>4</b>              | 269   | At4g24820              | Probable 26S proteasome non-ATPase regulatory subunit 6, RPN7                                                | K.VVDAPEILTVLGK.I          | 2+           | Oxidation (M)   | 1          | +      |
|                       |       |                        |                                                                                                              | K.VAGVLETNRPDAK.N          | 3+           |                 |            |        |
|                       |       |                        |                                                                                                              | K.LFLTLHPDVPDIEK.V         | 3+           |                 |            |        |
|                       |       |                        |                                                                                                              | K.AFGVSVDFIDQELSR.F        | 2+           |                 |            |        |
|                       |       |                        |                                                                                                              | K.DTDILAAFR.V              | 2+           |                 |            |        |
|                       |       |                        |                                                                                                              | R.ESTLGFVDLLR.D            | 2+           |                 |            |        |
|                       |       |                        |                                                                                                              | K.LTYTYPEYETK.D            | 2+           |                 |            |        |
| <b>5</b>              | 264   | AtCG00490              | Ribulosebiphosphate carboxylase                                                                              | K.TFQGPPIHQVER.D           | 3+           | Oxidation (M)   | 17         | -      |
|                       |       |                        |                                                                                                              | R.ESTLGFVDLLRDDYVEK.D      | 3+           |                 |            |        |
|                       |       |                        |                                                                                                              | R.GGLDFTKDDENVNSQPFMR.W    | 3+           |                 |            |        |
|                       |       |                        |                                                                                                              | K.AAQEALYVR.C              | 2+           |                 |            |        |
|                       |       |                        |                                                                                                              | R.NLNAMNQLK.T              | 2+           |                 |            |        |
|                       |       |                        |                                                                                                              | K.ANSEATLGTYK.G            | 2+           |                 |            |        |
|                       |       |                        |                                                                                                              | K.VSPEVIAEHTVR.A           | 3+           |                 |            |        |
| <b>6<sup>b</sup></b>  | 247   | At3g52930              | Fructose biphosphate aldolase-like protein                                                                   | K.RLASINVENVETNR.R         | 3+           | Oxidation (M)   | 7          | -      |
|                       |       |                        |                                                                                                              | R.TVPAVPAIVFLSGGQSEEEATR.N | 3+           |                 |            |        |
|                       |       |                        |                                                                                                              | K.LFVDILK.E                | 2+           |                 |            |        |
|                       |       |                        |                                                                                                              | K.GILAADESTGTIGK.R         | 2+           |                 |            |        |
|                       |       |                        |                                                                                                              | K.YYEAGAR.F                | 2+           |                 |            |        |
|                       |       |                        |                                                                                                              | K.FADELIANAAYIGTPGK.G      | 2+           |                 |            |        |
|                       |       |                        |                                                                                                              | R.NLLSVAYK.N               | 2+           |                 |            |        |
| <b>7</b>              | 245   | At4g09000              | 14-3-3-like protein GF14 chi                                                                                 | K.DSTLIMQLLR.D             | 2+           | Oxidation (M)   | 4          | -      |
|                       |       |                        |                                                                                                              | R.IISSIEQKEESR.G           | 3+           |                 |            |        |
|                       |       |                        |                                                                                                              | K.LLDTILVPAASGDSK.V        | 2+           |                 |            |        |
|                       |       |                        |                                                                                                              | K.AAQDIANSELAPTHPIR.L      | 3+           |                 |            |        |
|                       |       |                        |                                                                                                              | K.EAAPAAAKPADEQQS.-        | 2+           |                 |            |        |
|                       |       |                        |                                                                                                              | K.VLDVYEAR.L               | 2+           |                 |            |        |
|                       |       |                        |                                                                                                              | K.LAFEQIFK.S               | 2+           |                 |            |        |
| <b>8</b>              | 231   | At4g02520              | Glutathione S-transferase PM24                                                                               | R.NPFGQVPFEDGDLK.L         | 2+           | Oxidation (M)   | 6          | -      |
|                       |       |                        |                                                                                                              | K.SIYGLTTDEAVVAEEEA.K.L    | 2+           |                 |            |        |
|                       |       |                        |                                                                                                              | K.SLSMVYNR.K               | 2+           |                 |            |        |
|                       |       |                        |                                                                                                              | K.YLEAGTLPTAK.E            | 2+           |                 |            |        |
|                       |       |                        |                                                                                                              | K.GLGLYTVISVGK.K           | 2+           |                 |            |        |
|                       |       |                        |                                                                                                              | R.ALQESLASELAAR.M          | 2+           |                 |            |        |
|                       |       |                        |                                                                                                              | K.ITGEILEIVAGANAQV.-       | 2+           |                 |            |        |
| <b>9</b>              | 213   | At4g04640              | ATP synthase gamma chain                                                                                     | K.NVSLYQFR.N               | 2+           | Oxidation (M)   | 7          | +      |
|                       |       |                        |                                                                                                              | R.VQFTEYVQK.N              | 2+           |                 |            |        |
|                       |       |                        |                                                                                                              | R.LVIAPPNFVIK.I            | 2+           |                 |            |        |
|                       |       |                        |                                                                                                              | R.NGIPLSTAAANFTR.G         | 2+           |                 |            |        |
|                       |       |                        |                                                                                                              | K.LVAASGEPGDR.V            | 2+           |                 |            |        |
|                       |       |                        |                                                                                                              | R.GELATALR.K               | 2+           |                 |            |        |
|                       |       |                        |                                                                                                              | K.VAINGFGR.I               | 2+           |                 |            |        |
| <b>10</b>             | 201   | At4g14800              | Proteasome subunit beta type-2-B                                                                             | K.IIQVSVNR.N               | 2+           | Oxidation (M)   | 2          | -      |
|                       |       |                        |                                                                                                              | K.TFAEEVNAAFR.D            | 2+           |                 |            |        |
|                       |       |                        |                                                                                                              | R.KDSPLDIIAINDTGGVK.Q      | 3+           |                 |            |        |
|                       |       |                        |                                                                                                              | K.YSEGYPGAR.Y              | 2+           |                 |            |        |
|                       |       |                        |                                                                                                              | K.FAQTLMER.G               | 2+           |                 |            |        |
|                       |       |                        |                                                                                                              | K.VLEAVHIASNK.N            | 2+           |                 |            |        |
|                       |       |                        |                                                                                                              | K.AYQEQVLSNSAK.F           | 2+           |                 |            |        |
| <b>11</b>             | 191   | At4g37930              | Glycine hydroxymethyltransferase like protein                                                                | R.HYYSIAINYR.K             | 2+           | Oxidation (M)   | 1          | -      |
|                       |       |                        |                                                                                                              | R.SINPQITMLGQEP.R.Q        | 2+           |                 |            |        |
|                       |       |                        |                                                                                                              | K.TNEQTVQEMLSLAAK.Y        | 2+           |                 |            |        |
|                       |       |                        |                                                                                                              | R.AGVPMVEMGLMLGEFVDEYTVR.V | 3+           |                 |            |        |
|                       |       |                        |                                                                                                              | R.AVAVVVDPIQSVK.G          | 2+           |                 |            |        |
|                       |       |                        |                                                                                                              | K.VVIDAFR.S                | 2+           |                 |            |        |
|                       |       |                        |                                                                                                              | K.WTDGLTLR.R               | 2+           |                 |            |        |
| <b>12</b>             | 187   | At5g23540              | 26S proteasome subunit RPN11                                                                                 | K.AVQEEDELSPEK.L           | 2+           | 3 Oxidation (M) | 3          | +      |
|                       |       |                        |                                                                                                              | R.AVLSSSGFQADV.K.A         | 2+           |                 |            |        |
|                       |       |                        |                                                                                                              | R.MSTGYSILSR.D             | 2+           |                 |            |        |
|                       |       |                        |                                                                                                              | R.FEETLYGTSR.L             | 2+           |                 |            |        |
|                       |       |                        |                                                                                                              | R.YTGGMVPDVNQIVK.E         | 2+           |                 |            |        |
|                       |       |                        |                                                                                                              | K.GFPGTHEFLLDDEGK.W        | 3+           |                 |            |        |
|                       |       |                        |                                                                                                              | K.LTGITGGDQVAAMGIYGP.R.T   | 3+           |                 |            |        |
| <b>13</b>             | 185   | At3g60820              | PBF1 (20S proteasome beta subunit F1)                                                                        | K.LLSVVSGLNR.G             | 2+           | Oxidation (M)   | 1          | +      |
|                       |       |                        |                                                                                                              | R.LLYSSAFSSR.S             | 2+           |                 |            |        |
|                       |       |                        |                                                                                                              | R.GLVASVDDLER.A            | 2+           |                 |            |        |
|                       |       |                        |                                                                                                              | R.YTGGMVPDVNQIVK.E         | 2+           |                 |            |        |
|                       |       |                        |                                                                                                              | K.GFPGTHEFLLDDEGK.W        | 3+           |                 |            |        |
|                       |       |                        |                                                                                                              | K.LTGITGGDQVAAMGIYGP.R.T   | 3+           |                 |            |        |
|                       |       |                        |                                                                                                              | K.LTGGMVPDVNQIVK.E         | 2+           |                 |            |        |
| <b>14<sup>a</sup></b> | 181   | At3g55800              | Sedoheptulose-bisphosphatase precursor                                                                       | R.FEETLYGTSR.L             | 2+           | Oxidation (M)   | 1          | +      |
|                       |       |                        |                                                                                                              | R.YTGGMVPDVNQIVK.E         | 2+           |                 |            |        |
|                       |       |                        |                                                                                                              | K.GFPGTHEFLLDDEGK.W        | 3+           |                 |            |        |
|                       |       |                        |                                                                                                              | K.LTGITGGDQVAAMGIYGP.R.T   | 3+           |                 |            |        |
|                       |       |                        |                                                                                                              | K.LLSVVSGLNR.G             | 2+           |                 |            |        |
|                       |       |                        |                                                                                                              | R.LLYSSAFSSR.S             | 2+           |                 |            |        |
|                       |       |                        |                                                                                                              | R.GLVASVDDLER.A            | 2+           |                 |            |        |
| <b>15</b>             | 181   | At3g23400              | Harpin binding protein 1                                                                                     | K.LLSVVSGLNR.G             | 2+           | Oxidation (M)   | 1          | +      |
|                       |       |                        |                                                                                                              | R.LLYSSAFSSR.S             | 2+           |                 |            |        |
|                       |       |                        |                                                                                                              | R.GLVASVDDLER.A            | 2+           |                 |            |        |
|                       |       |                        |                                                                                                              | R.YTGGMVPDVNQIVK.E         | 2+           |                 |            |        |
|                       |       |                        |                                                                                                              | K.GFPGTHEFLLDDEGK.W        | 3+           |                 |            |        |
|                       |       |                        |                                                                                                              | K.LTGITGGDQVAAMGIYGP.R.T   | 3+           |                 |            |        |
|                       |       |                        |                                                                                                              | K.LTGGMVPDVNQIVK.E         | 2+           |                 |            |        |
| <b>16</b>             | 181   | At3g23400              | Harpin binding protein 1                                                                                     | R.LLYSSAFSSR.S             | 2+           | Oxidation (M)   | 1          | +      |
|                       |       |                        |                                                                                                              | R.GLVASVDDLER.A            | 2+           |                 |            |        |
|                       |       |                        |                                                                                                              | R.YTGGMVPDVNQIVK.E         | 2+           |                 |            |        |
|                       |       |                        |                                                                                                              | K.GFPGTHEFLLDDEGK.W        | 3+           |                 |            |        |
|                       |       |                        |                                                                                                              | K.LTGITGGDQVAAMGIYGP.R.T   | 3+           |                 |            |        |
|                       |       |                        |                                                                                                              | K.LTGGMVPDVNQIVK.E         | 2+           |                 |            |        |
|                       |       |                        |                                                                                                              | R.LLYSSAFSSR.S             | 2+           |                 |            |        |

|                 |     |                                     |                                                                                        |                                                                                                                                                                |                                        |                                  |   |   |
|-----------------|-----|-------------------------------------|----------------------------------------------------------------------------------------|----------------------------------------------------------------------------------------------------------------------------------------------------------------|----------------------------------------|----------------------------------|---|---|
| 17              | 178 | At2g30200                           | Binding / catalytic/ transferase                                                       | R.LEAALAATEIR.S<br>K.SAMVSIIGLDSEK.V<br>K.LRGEAMQAAADAAS.S                                                                                                     | 2+<br>2+<br>3+                         | Oxidation (M)<br>Oxidation (M)   | 1 | + |
| 18              | 176 | At1g32060                           | Ribulose-5-phosphate kinase                                                            | K.FYGEVTQGMK.H<br>R.ANDFDLMYEQVK.A<br>K.HADFPGSNNGTGLFQTIVGLK.I                                                                                                | 2+<br>2+<br>3+                         | Oxidation (M)<br>Oxidation (M)   | 1 | + |
| 19              | 172 | At2g39730                           | Rubisco activase                                                                       | R.GLAYDTSDDQDITR.G<br>R.EGPPVFEQPEPTYEK.L<br>K.LMEYGNMLVMEQENVKR.V<br>R.VQLAETYLSQLAALGDANADAIGR.G                                                             | 2+<br>2+<br>3+<br>3+                   | Oxidation (M)<br>3 Oxidation (M) | 2 | + |
| 20              | 163 | At1g30630                           | Coatomer protein epsilon subunit family protein                                        | K.ESTISL.R.E<br>R.AASAEDNFER.A<br>K.LLAMYLSSPENK.E<br>K.LSHPEHLVLR                                                                                             | 2+<br>2+<br>2+<br>2+                   | Oxidation (M)                    | 4 | + |
| 21              | 163 | At5g43010                           | 26S proteasome RPT4A                                                                   | R.TAAVSEYR.K<br>K.VVSSAIDK.Y<br>K.GVLLYGPPGTGK.T<br>R.AIASNIDANFLK.V<br>K.SLQSVGQIIGEVLRPLDNER.L<br>R.VLDMTTLTIMR.A                                            | 2+<br>2+<br>2+<br>2+<br>3+<br>2+       | 2 Oxidation (M)                  | 2 | + |
| 22              | 162 | At4g14880                           | Cysteine synthase                                                                      | R.YLSTVLFDAIR.K<br>K.LFVAIFPSFGER.Y<br>K.IDGFVSGIGTGTITGAGK.Y                                                                                                  | 2+<br>2+<br>2+                         |                                  | 2 | + |
| 23              | 162 | At1g35160                           | RF4 (General regulatory factor 4)                                                      | K.DSTLIMQLLR.D<br>R.KDAAEHTLTAYK.A<br>R.YEEMVEFMEK.V<br>K.AAQDIANAELAPTHPIR.L                                                                                  | 2+<br>3+<br>2+<br>3+                   | Oxidation (M)<br>2 Oxidation (M) | 2 | + |
| 24              | 162 | At1g78300                           | GRF2; protein phosphorylated amino acid binding                                        | R.NLLSVAYK.N<br>K.DSTLIMQLLR.D<br>R.IISIEQKEESR.G<br>K.SAQDIANAELAPTHPIR.L                                                                                     | 2+<br>2+<br>3+<br>2+                   | Oxidation (M)                    | 2 | - |
| 25              | 162 | At5g14740                           | beta carbonic anhydrase 2                                                              | R.NIANMVPPFDK.V<br>K.ITAELQAASSDSK.S<br>M.GNESYEDAIEALK.L                                                                                                      | 2+<br>2+<br>3+                         | Oxidation (M)                    | 2 | + |
| 26 <sup>b</sup> | 162 | At4g14960<br>At1g50010<br>At1g04820 | Tubulin alpha-6 chain<br>TUA2 (tubulin alpha-2 chain)<br>tubulin alpha-2/alpha-4 chain | R.LVSVQVISSLTASLR.F<br>R.AVFVLDLEPTVIDEVR.T<br>R.IHFMLSSYAPVISAER.A<br>K.DVNAAVGTIK.T                                                                          | 3+<br>2+<br>3+<br>2+                   | Oxidation (M)                    | 4 | + |
| 27              | 159 | At1g45000                           | 26S proteasome regulatory complex subunit p42D, putative                               | R.TAAVTDYR.K<br>K.VVSSAIDK.Y<br>K.GVLLYGPPGTGK.T<br>R.VLDMTTLTIMR.A<br>R.AIASNIDANFLK.V<br>K.SLQSVGQIIGEVLRPLDNER.L                                            | 2+<br>2+<br>2+<br>2+<br>2+<br>3+       | 2 Oxidation (M)                  | 2 | + |
| 28 <sup>b</sup> | 155 | At1g78900                           | Vacuolar-type H+-ATPase subunit A                                                      | R.LASFYER.A<br>K.LYDDLNAGFR.A<br>K.LAADTPLL TGQR.V<br>R.VGHDNLIGEIR.L<br>K.YSTALESFYEK.F<br>R.LAEMPADSGYPAYLAAR.L<br>R.EDDLNEIVQLVGK.D<br>R.TTLVANTSNMPPVAAR.E | 2+<br>2+<br>2+<br>3+<br>2+<br>2+<br>2+ | Oxidation (M)<br>Oxidation (M)   | 2 | + |
| 29              | 152 | At3g11630                           | 2-cys peroxiredoxin, chloroplast (BAS1)                                                | K.AQADDLPLVGNK.A<br>K.EGVQIHSTINNLGIGR.S<br>K.SGGLGDLNLYPLISDVTK.S                                                                                             | 2+<br>3+<br>2+                         |                                  | 1 | + |
| 30              | 150 | At3g60750                           | Transketolase                                                                          | K.TPSLALS.R.Q<br>K.VTTTIGYGSFNK.A<br>R.NLSQQCLNALAK.V<br>K.ALPTYTPESPGDATR.N<br>K.ESVLPDVSAR.V                                                                 | 2+<br>2+<br>2+<br>2+<br>2+             |                                  | 4 | + |
| 31              | 149 | At1g20620                           | CAT3 (CATALASE 3); catalase                                                            | R.DEEINYPSPK.F<br>K.VPTPTNSVTGIR.T<br>R.HMEGFGVHTYTLIAK.S<br>R.DGIQFPDVVHALKPNPK.T                                                                             | 2+<br>2+<br>3+<br>2+                   | Oxidation (M)                    | 1 | + |
| 32              | 148 | At2g27020                           | PAG1 (20S proteasome alpha subunit G1)                                                 | K.AVDNSGTVVGIK.C<br>K.MMLPGSNR.R<br>R.SYESVYGDVAVPK.E                                                                                                          | 2+<br>2+<br>2+                         |                                  | 3 | - |
| 33              | 147 | AtMg01190                           | ATP synthase subunit alpha, mitochondrial                                              | R.GIRPAINVGLSVSR.V<br>R.NFYANFQVDEIGR.V<br>K.AILNSVKPELLQALK.G<br>R.EVAFAQFGSDLDAAATQALLNR.G<br>K.AVDSLVPIGR.G<br>K.SVHEPMQTGLK.A                              | 3+<br>2+<br>3+<br>3+<br>2+<br>3+       |                                  | 4 | - |
| 34              | 145 | At3g02090                           | Putative mitochondrial processing peptidase                                            | R.VSDADVTR.A<br>R.IDAVDASTVK.R<br>R.EDLQNYIK.T                                                                                                                 | 2+<br>2+<br>2+                         |                                  | 1 | + |
| 35              | 142 | At3g14420                           | Glycolate oxidase/ oxidoreductase                                                      | K.AIALTVDTPLR.L<br>R.IPVFLDGGVR.R<br>R.FTLPPNLT.LK.N<br>K.MAHPDGEYATAR.A                                                                                       | 2+<br>2+<br>2+<br>3+                   | Oxidation (M)                    | 1 | - |
| 36              | 141 | At4g38970                           | Putative fructose-bisphosphate aldolase                                                | R.ATPEQVAAYTLK.L<br>R.LDSIGLENTAANR.Q                                                                                                                          | 2+<br>2+                               |                                  | 2 | - |
| 37              | 140 | At4g09320                           | Nucleoside diphosphate kinase 1                                                        | R.NVIHGSDSVESAR.K<br>K.IIGATNPAASEPGTIR.G                                                                                                                      | 2+<br>2+                               |                                  | 3 | - |
| 38              | 140 | At1g16470<br>At1g79210              | Proteasome subunit alpha type-2-A<br>20S proteasome alpha subunit B, putative          | K.EGFEGEISSK.N<br>K.KLPSILVDEASVQK.I                                                                                                                           | 2+<br>3+                               |                                  | 2 | - |
| 39              | 138 | AtCG00120                           | ATPase alpha subunit                                                                   | R.ELIIGDR.Q<br>R.VINALANPIDGR.G<br>R.LIESPAPGIIISR.R<br>K.EGIIQEQLER.F<br>K.IAQIPVSEAYLGR.V                                                                    | 2+<br>2+<br>2+<br>2+<br>2+             |                                  | 4 | - |
| 40              | 137 | At2g31610                           | 40S ribosomal protein S3 (RPS3A)                                                       | K.TPLPDVVIHAPK.D<br>R.ELAEDGYSYGVVVR.V<br>K.FKDGVMVSSGGPTK.E                                                                                                   | 3+<br>2+<br>3+                         | Oxidation (M)                    | 1 | + |

|                 |     |                                                  |                                                                                                             |                                                                                                                    |                                        |                                |   |   |
|-----------------|-----|--------------------------------------------------|-------------------------------------------------------------------------------------------------------------|--------------------------------------------------------------------------------------------------------------------|----------------------------------------|--------------------------------|---|---|
| 41              | 134 | At2g28000                                        | 60-kDa chaperonin-60 alpha-polypeptide                                                                      | R.NVVDEFGSPK.V<br>K.TVQGLIEELQK.K<br>K.DIIPILEK.T<br>K.VVNDGVTIAR.A                                                | 2+<br>2+<br>2+<br>2+                   |                                | 2 | + |
| 42              | 130 | At2g42600                                        | ATPPC2 (PHOSPHOENOLPYRUVATE CARBOXYLASE 2)                                                                  | R.VTPEVTR.D<br>K.NIGINER.V<br>R.TPPTPODEMRA<br>R.EIQAAFR.T<br>R.LATPELEYGR.M<br>R.FVEYFRL                          | 2+<br>2+<br>2+<br>2+<br>2+<br>2+       |                                | 3 | + |
| 43              | 129 | At5g20720                                        | Cpn21 protein                                                                                               | K.DGSNYIALR.A<br>K.EKPSIGTVIAGPGSLDEEGK.I                                                                          | 2+<br>3+                               |                                | 1 | - |
| 44              | 129 | At1g21720                                        | Putative 20S proteasome beta subunit PBC2                                                                   | R.DMKPETFASLVSAILYK.R<br>R.VFIGLSGLATDVQTLTYQR.L                                                                   | 2+<br>2+                               | Oxidation (M)                  | 2 | + |
| 45              | 128 | At3g28300                                        | AT14A (At14a-2 integrin - like protein)                                                                     | K.ITSMNLNAV.K<br>K.DATEDGANEVDTK.Q                                                                                 | 2+<br>2+                               | Oxidation (M)                  | 1 | + |
| 46              | 126 | At2g05840                                        | PAA2 (20S PROTEASOME SUBUNIT PAA2)                                                                          | K.ATEIEVGVVRA<br>K.YLGLLATGMTADSR.S                                                                                | 2+<br>2+                               | Oxidation (M)                  | 1 | + |
| 47              | 125 | At3g62030                                        | Peptidyl-prolyl cis-trans isomerase CYP20-3                                                                 | K.FEDENFTLK.H<br>R.IVMGLFGEVVPK.T<br>K.HVVFQGVIEGMK.L                                                              | 2+<br>2+<br>2+                         | Oxidation (M)<br>Oxidation (M) | 1 | - |
| 48              | 123 | At5g38420                                        | Ribulose biphosphate carboxylase small chain 2B                                                             | K.EVDYLLR.N<br>R.IIGFDNTR.Q<br>K.KFETLSYLPDLSDELAK.E                                                               | 2+<br>2+<br>3+                         |                                | 6 | + |
| 49              | 122 | At5g09900                                        | 26S proteasome subunit RPN5a                                                                                | K.SMIGGSLGDK.A<br>K.HLSEMVVSK.A<br>K.IAFILEQVR.L<br>K.TLNNVSAGK.I<br>K.NLSEIPDFK.M<br>K.IAFILEQVR.L<br>K.YKDEFEK.E | 2+<br>2+<br>2+<br>2+<br>2+<br>2+<br>2+ | Oxidation (M)<br>Oxidation (M) | 3 | - |
| 50              | 122 | At2g47510                                        | FUM1 (FUMARASE 1); fumarate hydratase                                                                       | R.LIADASASFEK.N<br>R.SLQNFIEIGGER.E<br>K.VNMEYGLDPTIGK.A                                                           | 2+<br>2+<br>2+                         | Oxidation (M)                  | 1 | + |
| 51              | 122 | At2g43750                                        | Cysteine synthase, chloroplast/chromoplast precursor                                                        | K.LIAVVFPSFGER.Y<br>R.AFGAELVLTTEPAK.G                                                                             | 2+<br>2+                               |                                | 2 | + |
| 52 <sup>a</sup> | 122 | At3g58700<br>At4g18730<br>At5g45775<br>At2g42740 | Ribosomal protein L16<br>60S ribosomal protein L11 (RPL11D)<br>RPL16A (ribosomal protein large subunit 16A) | K.YEGVILNK.S<br>K.AMQLLESGLK.V<br>K.VLEQLSGQTPVFSK.A                                                               | 2+<br>2+<br>2+                         | Oxidation (M)                  | 1 | - |
| 53              | 121 | At1g04410                                        | Malate dehydrogenase/ oxidoreductase                                                                        | R.LSVPVSDVK.N<br>K.MELIDAAFPLK.G<br>K.MDLTAEELKEEK.D                                                               | 2+<br>2+<br>3+                         | Oxidation (M)<br>Oxidation (M) | 1 | - |
| 54              | 120 | At2g20580                                        | 26S proteasome subunit RPN1a                                                                                | K.TPEDIYK.A<br>R.NLSSYYK.D<br>R.TCNYLTSAAAR.Y<br>K.AFHETMADSDLKK.Y<br>K.VQDLLAQCGHELEK.G                           | 2+<br>2+<br>2+<br>3+<br>3+             | Oxidation (M)                  | 1 | - |
| 55              | 119 | At4g02770                                        | Putative photosystem I reaction center subunit II precursor                                                 | K.TDSSAAAAAAPATK.E<br>R.VFPNGEVQYLHPK.D                                                                            | 2+<br>3+                               |                                | 4 | - |
| 56              | 115 | At1g64520                                        | 26S proteasome subunit RPN12                                                                                | K.TEDQDAFER.D<br>R.DIYEHAVVLSVK.T<br>K.AYDYVSISDAR.Q                                                               | 2+<br>3+<br>2+                         |                                | 5 | + |
| 57              | 112 | At1g29150                                        | 26S proteasome subunit RPN6a                                                                                | R.LAALLMENK.E<br>K.LRPFSLIPK.A<br>K.AGLQYVGPDLAMK.A<br>K.EYVEALALLSTLVK.E                                          | 2+<br>3+<br>2+<br>2+                   | Oxidation (M)<br>Oxidation (M) | 2 | + |
| 58              | 110 | At1g09100<br>At3g05530                           | RPT5B (26S proteasome AAA-ATPase subunit RPT5B)<br>RPT5A (regulatory particle triple-A 5A)                  | R.FDSEVSGDR.E<br>R.STDDFNQAQLK.A<br>K.QIQELVEAIVLPMTHK.E                                                           | 2+<br>2+<br>3+                         | Oxidation (M)                  | 1 | + |
| 59              | 109 | At2g30860                                        | ATGSTF9; glutathione transferase                                                                            | R.ALVTIEK.G<br>R.SQGPDLLGK.T<br>K.LAGVLDVYEAHLSK.S                                                                 | 2+<br>2+<br>3+                         |                                | 1 | - |
| 60 <sup>b</sup> | 108 | At2g01250                                        | Structural constituent of ribosome / transcription regulator                                                | R.IALTDNSIVEQALGK.H                                                                                                | 2+                                     |                                | 1 | + |
| 61              | 107 | At1g07890                                        | APX1; L-ascorbate peroxidase                                                                                | R.TGGPFGTMR.F<br>K.EGLLQLVSDK.A<br>R.EDKPPPPPEGR.L<br>K.ALLDDPVFRPLVEK.Y                                           | 2+<br>2+<br>3+<br>3+                   | Oxidation (M)                  | 1 | - |
| 62              | 106 | At4g28750                                        | Photosystem I subunit PSI-E-like protein                                                                    | R.AAEDPAPASSSK.D<br>K.NVGSVVAVDQDPK.T                                                                              | 2+<br>2+                               |                                | 2 | + |
| 63              | 104 | At5g35590                                        | PAA1 (20S proteasome alpha subunit A1)                                                                      | K.TAGITSIGVR.G<br>K.EQEAVNFLEK.K                                                                                   | 2+<br>2+                               |                                | 2 | + |
| 64              | 102 | At3g22630                                        | Proteasome subunit beta type-2-A                                                                            | K.NVSLYKFR.N<br>R.VQFTEYVQK.N                                                                                      | 2+<br>2+                               |                                | 1 | + |
| 65              | 102 | At2g36160                                        | 40S ribosomal protein S14 (RPS14A)                                                                          | K.TPGPGAQSALR.A<br>K.VDVVTLGFSVR.E                                                                                 | 2+<br>2+                               |                                | 3 | + |
| 66 <sup>b</sup> | 99  | At4g20360                                        | Elongation factor Tu precursor                                                                              | K.VGETVDLVGLR.E                                                                                                    | 2+                                     |                                | 2 | - |
| 67 <sup>a</sup> | 98  | At5g10860                                        | Uncharacterized protein At5g10860, mitochondrial precursor                                                  | K.LITVTPETK.V<br>K.VGDMTEENK.L                                                                                     | 2+<br>2+                               |                                | 4 | + |
| 68              | 96  | At3g13120                                        | 30S ribosomal protein S10, chloroplast, putative                                                            | R.FHFEIR.T<br>K.TMGPVPLPTK.K                                                                                       | 2+<br>2+                               |                                | 2 | + |
| 69 <sup>b</sup> | 96  | At3g17390                                        | MTO3; methionine adenosyltransferase                                                                        | K.ANVDYEQIVR.K<br>K.IPDKEILEIVK.E<br>R.FVIGGPHGDAGLTGR.K<br>K.SIVASGLAR.R                                          | 2+<br>3+<br>3+<br>2+                   |                                | 8 | - |
| 70              | 96  | At5g19990<br>At5g20000                           | 26S proteasome AAA-ATPase subunit<br>Similar to 26S proteasome AAA-ATPase subunit RPT6a                     | K.GVLLYGGPPGTGK.T<br>K.HPELFESLGIAPK.G                                                                             | 2+<br>3+                               |                                | 1 | + |
| 71              | 95  | At1g65930                                        | Isocitrate dehydrogenase (NADP+)-oxidoreductase                                                             | R.LIDDMVAYALK.S<br>K.LITPFVELDIK.Y<br>R.AFADASMNTAYEK.K                                                            | 2+<br>2+<br>2+                         | Oxidation (M)                  | 1 | - |
| 72              | 94  | At3g20820                                        | Leucine-rich repeat family protein                                                                          | R.VADINLR.G<br>R.LSAITADWK.G<br>R.LAVLNVADNR.I                                                                     | 2+<br>2+<br>2+                         |                                | 2 | + |

|                  |    |                                                  |                                                                           |                                                                                                           |                            |                                |   |   |
|------------------|----|--------------------------------------------------|---------------------------------------------------------------------------|-----------------------------------------------------------------------------------------------------------|----------------------------|--------------------------------|---|---|
|                  |    |                                                  |                                                                           | R.IPESLTNIYR.L                                                                                            | 2+                         |                                |   |   |
| 73               | 94 | At4g25100                                        | FSD1 (FE SUPEROXIDE DISMUTASE 1); iron superoxide dismutase               | K.TFMTNLVSWAVSAR.L                                                                                        | 2+                         | Oxidation (M)                  | 1 | - |
| 74               | 92 | At5g04590                                        | Sulfite reductase                                                         | R.NVLAPAAPYVK.K<br>K.VGLDYDESIVIR.V                                                                       | 2+<br>2+                   |                                | 1 | + |
| 75               | 92 | At1g05190                                        | EMB2394; structural constituent of ribosome                               | K.MQIPDSLK.V<br>R.TLTDNMVVGVS.K.G                                                                         | 2+<br>2+                   | Oxidation (M)<br>Oxidation (M) | 1 | + |
| 76               | 92 | At2g21330                                        | Fructose-bisphosphate aldolase, putative                                  | K.ANSLAQLGK.Y<br>K.AAQDILLAR.A                                                                            | 2+<br>2+                   |                                | 1 | - |
| 77               | 91 | At5g36790                                        | Putative p-nitrophenylphosphatase                                         | K.ISDFLSPK.A<br>K.VYVIGEEGILK.E                                                                           | 2+<br>2+                   |                                | 1 | - |
| 78               | 91 | At1g47250                                        | PAF2 (20S proteasome alpha subunit F2)                                    | R.ETLQGETLK.S                                                                                             | 2+                         |                                | 2 | + |
|                  |    | At5g42790                                        | PAF1; endopeptidase/ peptidase/ threonine endopeptidase                   | K.VDDHIGVAIAGLTADGR.V                                                                                     | 3+                         |                                |   |   |
| 79               | 90 | At5g58290                                        | 26S proteasome AAA-ATPase subunit RPT3 (RPT3)                             | R.FDAQTGADR.E<br>R.VVGSEFVQK.Y                                                                            | 2+<br>2+                   |                                | 1 | + |
| 80               | 90 | At5g14320                                        | 30S ribosomal protein S13, chloroplast precursor                          | R.HIQGLPCR.G<br>R.VGGVEIPANK.R                                                                            | 2+<br>2+                   |                                | 2 | + |
| 81               | 89 | At5g04140                                        | Ferredoxin-dependent glutamate synthase                                   | K.LVAAEAGIGTVASGVAK.G<br>K.VAQGAKPGEQGLPGK.K<br>R.ICHTNNCPVGVASQR.E                                       | 2+<br>3+<br>3+             |                                | 2 | + |
| 82               | 88 | At1g12840                                        | DET3 (DE-ETIOLATED 3)                                                     | R.GQLNAINR.K<br>K.LVQDQESLR.S<br>R.VAEYNNIR.G                                                             | 2+<br>2+<br>2+             |                                | 2 | + |
| 83               | 88 | At3g07090                                        | Unknown protein                                                           | K.LEAAETSTATEK.V                                                                                          | 2+                         |                                | 1 | - |
| 84               | 87 | At1g68010                                        | HPR (Hydroxyppyruvate reductase)                                          | K.FVTAYGQFLK.A<br>R.EGMATLAALNVLGR.V                                                                      | 2+<br>2+                   | Oxidation (M)                  | 1 | - |
| 85 <sup>b</sup>  | 86 | At5g02870                                        | 60S ribosomal protein-like                                                | R.MSLLAEASR.V<br>K.LESIYGSFEKPESEK.K                                                                      | 2+<br>3+                   | Oxidation (M)                  | 1 | + |
| 86               | 85 | At3g54050                                        | Fructose-bisphosphatase                                                   | R.TLLYGGIYGYPR.D<br>R.VLDIQPTEIHQR.V                                                                      | 2+<br>3+                   |                                | 1 | - |
| 87               | 84 | At1g50200                                        | Alanyl t-RNA synthetase                                                   | K.LATEAAESAASDGK.T                                                                                        | 2+                         |                                | 1 | + |
| 88 <sup>a</sup>  | 84 | At2g26080                                        | Glycine dehydrogenase (decarboxylating)                                   | K.IAILNANYMAK.R                                                                                           | 2+                         | Oxidation (M)                  | 1 | - |
|                  |    | At4g33010                                        | P-Protein-like protein                                                    | K.NTAGIEPEDVAK.R                                                                                          | 2+                         |                                |   |   |
| 89               | 83 | At2g30870                                        | ATGSTF10; glutathione transferase                                         | R.SQGPDLLGK.T<br>K.LAEVLDVYEAQLSK.N                                                                       | 2+<br>2+                   |                                | 1 | - |
| 90               | 83 | At4g38630                                        | 26S proteasome regulatory subunit S5A                                     | K.KALEIVGK.R<br>K.ELLASLPDESK.R<br>K.DGDTASASQETVAR.T<br>R.VLTPPTSDLGKI<br>K.DKDGDTASASQETVAR.T           | 2+<br>2+<br>2+<br>2+<br>3+ |                                | 4 | - |
| 91               | 82 | At2g38230                                        | ATPDX1.1 (Pyridoxine biosynthesis 1.1)                                    | K.IAAPYDLVQTK.E                                                                                           | 2+                         |                                | 1 | - |
| 92               | 82 | At4g13940                                        | Adenosylhomocysteinase                                                    | K.AGIIVLAEGR.L                                                                                            | 2+                         |                                | 1 | - |
| 93               | 82 | At5g63310                                        | Nucleoside diphosphate kinase II                                          | K.TDPLQAEPTIR.G<br>R.NIVHGSDSPENKGR.E                                                                     | 2+<br>3+                   |                                | 3 | + |
| 94               | 81 | At2g05990                                        | MOD1; enoyl-[acyl-carrier-protein] reductase (NADH)/ oxidoreductase       | R.VNTISAGPLGSR.A<br>R.IPGYGGGMSAK.A<br>R.VLPDGLMEIK.K                                                     | 2+<br>2+<br>2+             | Oxidation (M)<br>Oxidation (M) | 2 | + |
| 95               | 80 | At3g51260                                        | Proteasome subunit alpha type-7-A                                         | R.YIAGLQKQ.Y                                                                                              | 2+                         |                                | 5 | - |
|                  |    | At5g66140                                        | Proteasome subunit alpha type-7-B                                         | R.ALLEVVESGGK.N<br>R.LTLEDPVTVEYITR.Y                                                                     | 2+<br>2+                   |                                |   |   |
| 96 <sup>b</sup>  | 80 | At3g58610                                        | Ketol-acid reductoisomerase                                               | K.VSLAGYEEYIVR.G                                                                                          | 2+                         |                                | 2 | + |
| 97               | 79 | At1g69740                                        | Porphobilinogen synthase                                                  | K.TYQMNPNANYR.E<br>R.AGADVSPSPMDMDGR.V                                                                    | 2+<br>2+                   | Oxidation (M)<br>Oxidation (M) | 1 | + |
| 98               | 79 | At3g26520                                        | TIP2 (Tonoplast intrinsic protein2)                                       | R.NIAGGVQEEVYHPNALR.A                                                                                     | 3+                         |                                | 1 | + |
| 99 <sup>a</sup>  | 78 | At5g01410                                        | Pyridoxal biosynthesis protein PDX1.3                                     | K.VGLAQLMR.G<br>R.TKGEAGTGNIEAVR.H                                                                        | 2+<br>3+                   | Oxidation (M)                  | 3 | - |
| 100 <sup>b</sup> | 77 | At5g42980                                        | Thioredoxin H-type 3                                                      | R.FIAPVFADLAK.K<br>K.VQAMPTFIFMK.E                                                                        | 2+<br>2+                   | 2 Oxidation (M)                | 1 | - |
| 101 <sup>b</sup> | 76 | At1g58380<br>At1g59359<br>At2g41840<br>At3g57490 | 40S ribosomal protein S2 homolog                                          | K.VLQFAGIDDVFTSSR.G                                                                                       | 2+                         |                                | 1 | - |
| 102              | 75 | At2g36530                                        | Enolase                                                                   | K.LAMQEFMILPVGAASF.K.E<br>K.IVLPVPFNFVINGGSHAGNK.L                                                        | 3+<br>3+                   | 2 Oxidation (M)                | 2 | - |
| 103 <sup>b</sup> | 75 | At5g20010<br>At5g20020<br>At5g55190              | Atran1; GTP binding<br>Atran2; GTP binding<br>Atran3; GTP binding         | K.LVIVDGGTGK.T                                                                                            | 2+                         |                                | 1 | - |
| 104              | 75 | At1g19550<br>At1g19570                           | Glutathione dehydrogenase (ascorbate)                                     | R.VSAVDLSLAPK.L                                                                                           | 2+                         |                                | 1 | - |
| 105 <sup>b</sup> | 74 | At3g44310                                        | Nitrilase I                                                               | K.LMPTSLER.C<br>R.KLMPTSLER.C<br>K.GAELVLFPEGFIGGYPR.G<br>K.YIVEAASK.G                                    | 2+<br>2+<br>2+<br>2+       | Oxidation (M)<br>Oxidation (M) | 3 | + |
| 106 <sup>a</sup> | 73 | At5g48300                                        | ADP glucose pyrophosphorylase small subunit                               | K.IINSDNVQEAAR.E                                                                                          | 2+                         |                                | 1 | - |
| 107              | 72 | At3g27430<br>At5g40580                           | PBB1 (20S proteasome beta subunit B1)<br>20S proteasome beta subunit PBB2 | R.ATEGPVADK.N<br>R.NYMEPNPR.T                                                                             | 2+<br>2+                   |                                | 2 | - |
| 108              | 70 | At3g14310                                        | ATPME3 (Arabidopsis thaliana pectin methylesterase 3)                     | R.IGATSDLQSVK.G<br>K.TVAAAVAAAPENSINKR.Y                                                                  | 2+<br>3+                   |                                | 1 | + |
| 109              | 70 | At3g19950                                        | Zinc finger (C3HC4-type RING finger) family protein                       | K.SAIDALPTVK.V<br>R.SSGTHFEFVIENHPSDPGNR.M<br>K.SIQQNFQSDAPDPIIFLQNHILQILK<br>R.SQGSQGSQSGDQGSVEGQQT.PR.F | 2+<br>3+<br>3+<br>3+       |                                | 7 | + |
| 110              | 69 | At1g13060                                        | Proteasome precursor, beta subunit                                        | R.ASMGGYISSQSVK.K                                                                                         | 2+                         | Oxidation (M)                  | 1 | - |
| 111              | 69 | At1g32470                                        | Glycine cleavage system H protein, mitochondrial, putative                | K.VKPSSPAELEALMGPK.E                                                                                      | 3+                         | Oxidation (M)                  | 1 | - |
| 112              | 69 | At5g60600                                        | GcpE; 4-hydroxy-3-methylbut-2-en-1-yl diphosphate synthase                | R.GMVESAFEFAR.I                                                                                           | 2+                         | Oxidation (M)                  | 1 | + |
| 113              | 69 | At5g67590                                        | FRO1 (Frostbite1)                                                         | K.KPNTPLLK.V<br>K.VSGPIPEEHLR.K                                                                           | 2+<br>3+                   |                                | 2 | - |
| 114              | 68 | At3g49010                                        | 60S ribosomal protein L13-1                                               | K.KLAPTIGIADVDR.R                                                                                         | 3+                         |                                | 2 | - |
| 115              | 67 | At3g15950                                        | TSA1-LIKE                                                                 | R.NSMLEAFER.E<br>R.EFEAVTESFK.Q                                                                           | 2+<br>2+                   | Oxidation (M)                  | 2 | + |
| 116 <sup>b</sup> | 67 | At5g52640<br>At5g56000<br>At5g56010              | Heat shock protein 83<br>Heat shock protein<br>Heat shock protein 90A     | R.ELISSSDALDK.I                                                                                           | 2+                         |                                | 2 | + |
| 117              | 65 | At2g41530                                        | ATSF6H; Arabidopsis thaliana S-formylglutathione hydrolase                | K.LLSENFSQLDITTK.A                                                                                        | 2+                         |                                | 1 | - |
| 118 <sup>b</sup> | 64 | At1g49240                                        | ACT8 (ACTIN 8)                                                            | K.EITALAPSSMK.I                                                                                           | 2+                         | Oxidation (M)                  | 2 | + |

|                   |    |                                                                                                                   |                                                                                                                                                                                                                                                                     |                                              |          |                 |   |
|-------------------|----|-------------------------------------------------------------------------------------------------------------------|---------------------------------------------------------------------------------------------------------------------------------------------------------------------------------------------------------------------------------------------------------------------|----------------------------------------------|----------|-----------------|---|
|                   |    | At3g18780                                                                                                         | ACT2 (ACTIN 2)                                                                                                                                                                                                                                                      | K.AEYDEAGPGVHR.K                             | 3+       |                 |   |
| 119               | 64 | At3g02540                                                                                                         | RAD23-3; PUTATIVE DNA REPAIR PROTEIN RAD23-3                                                                                                                                                                                                                        | R.AAFNNPER.A                                 | 2+       | 1               | + |
|                   |    | At5g38470                                                                                                         | DNA repair protein RAD23, putative                                                                                                                                                                                                                                  | R.NSQQFQALR.A                                | 2+       |                 |   |
| 120               | 64 | At3g23990                                                                                                         | Chaperonin hsp60                                                                                                                                                                                                                                                    | K.SVAAGMNAMDLR.R                             | 2+       | 2 Oxidation (M) | + |
| 121 <sup>a</sup>  | 64 | At3g47520                                                                                                         | Malate dehydrogenase, chloroplast precursor                                                                                                                                                                                                                         | R.ANTFVFSQK.K<br>K.LFGVTTLDVVR.A             | 2+       | 1               | + |
| 122               | 64 | At3g61820                                                                                                         | Putative uncharacterized protein F15G16.210                                                                                                                                                                                                                         | R.VAYDLVGSR.V<br>R.GGLSFPSQTK.N              | 2+       | 1               | + |
| 123               | 63 | At2g37270<br>At3g11940                                                                                            | ATRPS5B (Ribosomal protein 5B); structural constituent of ribosome<br>ATRPS5A (Ribosomal protein 5A); structural constituent of ribosome                                                                                                                            | R.VNOAIFLLTTGAR.E                            | 2+       | 1               | - |
| 124               | 63 | At5g25980<br>At5g26000                                                                                            | TGG2 (glucoside glucosylase 2)<br>TGG1 (Thioglucoside glucosylase 1)                                                                                                                                                                                                | R.GYALGTDAPGR.C                              | 2+       | 2               | + |
| 125 <sup>b</sup>  | 62 | At1g53240                                                                                                         | Mitochondrial NAD-dependent malate dehydrogenase                                                                                                                                                                                                                    | K.ALEGADLVIIIPAGVPR.K                        | 2+       | 2               | + |
| 126               | 62 | At2g21580                                                                                                         | 40S ribosomal protein S25 (RPS25B)                                                                                                                                                                                                                                  | K.LITPSILSDR.M<br>R.MVSAHSSQIYTR.A           | 2+<br>3+ | 2               | - |
| 127               | 62 | At3g22230                                                                                                         | 60S ribosomal protein L27 (RPL27B)                                                                                                                                                                                                                                  | K.EVATLDALKSK.D                              | 2+       | 1               | + |
| 128               | 62 | At3g25530                                                                                                         | Gamma-hydroxybutyrate dehydrogenase (ATGHBHDH)                                                                                                                                                                                                                      | K.KPAEDGQLIILAAGDK.A                         | 3+       | 1               | + |
| 129               | 62 | At3g63140                                                                                                         | mRNA binding                                                                                                                                                                                                                                                        | K.STEQPPHVEGDAVK.A<br>R.AVPIPGSGLQLTNISHVR.D | 3+<br>3+ | 1               | + |
| 130               | 62 | At4g15000                                                                                                         | 60S ribosomal protein L27-3                                                                                                                                                                                                                                         | K.EVATLDALQSK.D                              | 2+       | 1               | + |
| 131 <sup>a</sup>  | 61 | At1g20260<br>At1g76030<br>At4g38510                                                                               | Vacuolar ATP synthase subunit B3<br>Vacuolar ATP synthase subunit B1<br>Probable H <sup>+</sup> -transporting ATPase                                                                                                                                                | K.SAIEGEMTR.K<br>K.HVLVLTDMSSYADALR.E        | 2+<br>2+ | Oxidation (M)   | + |
| 132               | 61 | At1g32990                                                                                                         | PRPL11 (Plastid ribosomal protein L11)                                                                                                                                                                                                                              | K.VGVITDQLR.T                                | 2+       | 1               | - |
| 133               | 61 | At2g45640                                                                                                         | SAP18 (SIN3 associated polypeptide P18)                                                                                                                                                                                                                             | K.SGGHHTSEDIYAVR.G                           | 3+       | 2               | - |
| 134 <sup>a</sup>  | 60 | At3g45970                                                                                                         | Expansin-like A1 precursor                                                                                                                                                                                                                                          | R.VPTGAIQFR.F                                | 2+       | 1               | - |
| 135 <sup>b</sup>  | 59 | At3g04840                                                                                                         | 40S ribosomal protein S3A (RPS3aA)                                                                                                                                                                                                                                  | K.LMVDVHGDIYSAEDVGVK.V                       | 3+       | Oxidation (M)   | + |
| 136               | 59 | At1g14320<br>At1g26910<br>At1g66580                                                                               | Structural constituent of ribosome                                                                                                                                                                                                                                  | K.ENVSSEALEAAR.I                             | 2+       | 1               | - |
| 137 <sup>ab</sup> | 59 | At1g20010<br>At1g75780<br>At2g29550<br>At4g20890<br>At5g12250<br>At5g23860<br>At5g44340<br>At5g62690<br>At5g62700 | TUB5 (tubulin beta-5 chain)<br>TUB1 (tubulin beta-1 chain)<br>TUB7 (tubulin beta-7 chain)<br>Tubulin beta-9 chain<br>TUB6 (BETA-6 TUBULIN)<br>TUB8 (tubulin beta-8)<br>TUB4 (tubulin beta-4 chain)<br>Putative tubulin beta-2/beta-3 chain<br>Tubulin beta-2/beta-3 | K.LAVNLIPFPR.L                               | 2+       | 3               | - |
| 138               | 58 | At1g11910                                                                                                         | Aspartyl protease family protein                                                                                                                                                                                                                                    | K.FDGLLGLFQIEISVGK.A                         | 2+       | 1               | + |
| 139               | 58 | At3g27830<br>At3g27850                                                                                            | 50S ribosomal protein L12-1<br>50S ribosomal protein L12-3                                                                                                                                                                                                          | R.LIVDYLQDK.F                                | 2+<br>2+ | 2               | - |
| 140               | 58 | At4g31300                                                                                                         | PBA1 (20S proteasome beta subunit A 1)                                                                                                                                                                                                                              | R.TVINSEGVTR.N<br>R.TSTGMVYANR.A             | 2+<br>2+ | 2               | + |
| 141               | 57 | At5g19440                                                                                                         | Alcohol dehydrogenase                                                                                                                                                                                                                                               | R.VVVTSSMAAVGYNGKPR.T                        | 3+       | Oxidation (M)   | + |
| 142               | 56 | At1g10840                                                                                                         | Eukaryotic initiation factor 3H1 subunit                                                                                                                                                                                                                            | R.VVQIEGLAVLK.I                              | 2+       | 1               | + |
| 143               | 56 | At1g76790                                                                                                         | O-methyltransferase                                                                                                                                                                                                                                                 | R.TGFSVAVLK.K                                | 2+       | 1               | + |
| 144 <sup>b</sup>  | 56 | At2g09990<br>At5g18380                                                                                            | 40S ribosomal protein S16 (RPS16A)<br>40S ribosomal protein S16 (RPS16C)                                                                                                                                                                                            | R.VNGGGHTSQVYAIR.Q                           | 3+       | 1               | + |
| 145               | 56 | At2g17390<br>At4g35450                                                                                            | AKR2B; protein binding / transcription regulator<br>AKR2 (Ankyrin repeat-containing protein 2)                                                                                                                                                                      | K.AALASGGNKDEEDSEGR.T                        | 3+       | 4               | - |
| 146               | 55 | At4g39260                                                                                                         | Glycine-rich RNA-binding protein 8                                                                                                                                                                                                                                  | R.TFSQFDVIDSK.I                              | 2+       | 1               | - |
| 147               | 54 | At1g78370                                                                                                         | Arabidopsis thaliana Glutathione S-transferase (class tau) 20                                                                                                                                                                                                       | K.SPILLQSNPIHK.K                             | 3+       | 1               | - |
| 148               | 54 | At3g05560                                                                                                         | 60S ribosomal protein L22-2 (RPL22B)                                                                                                                                                                                                                                | K.AGALGDSVTITR.E                             | 2+       | 1               | + |
| 149               | 54 | At5g26260<br>At5g26280<br>At5g26320                                                                               | Meprin and TRAF homology domain-containing protein                                                                                                                                                                                                                  | K.IVITISFSVIK.G<br>K.YLTVTDGLVK.R            | 2+<br>2+ | 2               | - |
| 150               | 53 | At1g58270                                                                                                         | ZW9, biological process unknown                                                                                                                                                                                                                                     | R.FLSFADIK.N                                 | 2+       | 1               | - |
| 151               | 53 | At4g37800                                                                                                         | Endo-xyloglucan transferase-like protein                                                                                                                                                                                                                            | R.SGQPYTVQTNVFAHGK.G                         | 3+       | 1               | - |
| 152               | 53 | At5g52960                                                                                                         | Unknown protein                                                                                                                                                                                                                                                     | K.SGPGNLER.D                                 | 2+       | 2               | + |
| 153               | 52 | At1g07770                                                                                                         | Ribosomal protein S15A                                                                                                                                                                                                                                              | K.FLIVMQK.H<br>R.ISVLNDALK.S                 | 2+<br>2+ | Oxidation (M)   | - |
| 154               | 52 | At1g20200                                                                                                         | 26S proteasome subunit RPN3a                                                                                                                                                                                                                                        | R.IGDLELFR.T                                 | 2+       | 1               | + |
| 155 <sup>b</sup>  | 52 | At1g54270<br>At1g72730<br>At3g13920                                                                               | Eukaryotic translation initiation factor 4A-2<br>RNA helicase (eukaryotic translation initiation factor 4A, putative)<br>Eukaryotic translation initiation factor 4A-1                                                                                              | K.RDELTLEGIK.Q                               | 2+       | 1               | - |
| 156               | 51 | At1g11580                                                                                                         | ATMPEPCRA                                                                                                                                                                                                                                                           | K.TVNEAVAAAPENSNTY.Y                         | 2+       | 1               | + |
| 157               | 51 | At1g29250                                                                                                         | Nucleic acid binding                                                                                                                                                                                                                                                | K.NNGFAVEK.K<br>K.IMTSTVDIK.D                | 2+<br>2+ | 2               | - |
| 158               | 51 | At3g01500                                                                                                         | Carbonic anhydrase, chloroplast precursor                                                                                                                                                                                                                           | K.AFDPVETIK.Q<br>R.NIANMVPPFDK.V             | 2+<br>2+ | 2               | - |
| 159               | 51 | At4g19006<br>At5g45620                                                                                            | 26S proteasome subunit RPN9b<br>26S proteasome subunit RPN9a                                                                                                                                                                                                        | R.VLGIPIQIK.S<br>K.LSIEDVEHLLMK.S            | 2+<br>3+ | 1               | + |
| 160               | 51 | At5g10540<br>At5g65620                                                                                            | Peptidase M3 family protein                                                                                                                                                                                                                                         | K.TQVIPPLPEDR.F                              | 2+       | 1               | + |
| 161               | 50 | At1g28410                                                                                                         | Similar to myosin heavy chain-related                                                                                                                                                                                                                               | K.SGLPLVQKR.T                                | 2+       | Phospho (STY)   | + |
| 162               | 50 | At2g33800                                                                                                         | Ribosomal protein S5 family protein                                                                                                                                                                                                                                 | R.IVLEMAGVENALGK.Q                           | 2+       | Oxidation (M)   | + |
| 163               | 49 | At3g01340                                                                                                         | Protein transport protein SEC13 family protein                                                                                                                                                                                                                      | K.ITGVSNSSGGSQHLATLTGHR.G                    | 3+       | 1               | - |
| 164               | 49 | At1g79550                                                                                                         | Phosphoglycerate kinase                                                                                                                                                                                                                                             | K.FAAGTEAVAK.Q                               | 2+       | 1               | - |
| 165               | 48 | At2g21170                                                                                                         | Triose-phosphate isomerase                                                                                                                                                                                                                                          | K.VASPPQQAQEVHVAVR.G                         | 3+       | 1               | - |
| 166               | 48 | At4g29350                                                                                                         | Profilin-2                                                                                                                                                                                                                                                          | K.YMVVQGEAGAVIR.G                            | 2+       | Oxidation (M)   | - |
| 167               | 48 | At5g37510                                                                                                         | EMB1467; NADH dehydrogenase                                                                                                                                                                                                                                         | R.YEAMVNAR.I                                 | 2+       | Oxidation (M)   | + |
| 168               | 47 | At1g63940                                                                                                         | Disulfide oxidoreductase/ oxidoreductase                                                                                                                                                                                                                            | K.EAYAPYERPALTK.A<br>R.TSTPGIFAGDVAAPFLK.I   | 3+<br>2+ | 1               | - |
| 169               | 47 | At3g24503                                                                                                         | ALDH2C4; aldehyde dehydrogenase/ oxidoreductase                                                                                                                                                                                                                     | R.VFVQEGYDK.V                                | 2+       | 1               | + |
| 170               | 47 | At3g52960                                                                                                         | Peroxisome oxidoreductase, chloroplast precursor                                                                                                                                                                                                                    | R.YAILADDGVVK.V                              | 2+       | 1               | - |
| 171               | 47 | At4g39200                                                                                                         | 40S ribosomal protein S25-4                                                                                                                                                                                                                                         | R.MVAAHSSQIYTR.A                             | 3+       | Oxidation (M)   | - |
| 172               | 46 | At1g02560                                                                                                         | ATP-dependent Clp protease proteolytic subunit 5                                                                                                                                                                                                                    | R.FQSIQSLFQYR.I                              | 2+       | 1               | + |
| 173               | 46 | At1g24510                                                                                                         | T-complex protein 1 epsilon subunit, putative putative                                                                                                                                                                                                              | K.AVLAVADLER.R                               | 2+       | 1               | + |
| 174               | 46 | At2g10450                                                                                                         | 14-3-3 protein, putative / grf15, putative                                                                                                                                                                                                                          | K.DSTLIMKILR.D                               | 2+       | Oxidation (M)   | - |
| 175               | 46 | At2g43030                                                                                                         | Ribosomal protein L3 family protein                                                                                                                                                                                                                                 | R.LTNIIEGFEPNQK.L                            | 2+       | 1               | - |
| 176               | 46 | At2g43160<br>At2g43170                                                                                            | Putative clathrin binding protein (epsin)<br>Epsin like protein                                                                                                                                                                                                     | R.VIDEIRER.A                                 | 2+       | 3               | + |
| 177               | 46 | At3g45030                                                                                                         | 40S ribosomal protein S20-1                                                                                                                                                                                                                                         | R.VIDLFSSPDDVK.Q                             | 2+       | 1               | + |

|                        |    |           |                                                     |                              |    |               |   |   |
|------------------------|----|-----------|-----------------------------------------------------|------------------------------|----|---------------|---|---|
|                        |    | At3g47370 | 40S ribosomal protein S20-2                         |                              |    |               |   |   |
|                        |    | At5g62300 | 40S ribosomal protein S20 (RPS20C)                  |                              |    |               |   |   |
| <b>178</b>             | 45 | At3g56910 | Ribosomal protein, chloroplast                      | K.TVVAVPVVK.L                | 2+ |               | 2 | + |
| <b>179<sup>b</sup></b> | 44 | At1g23310 | Alanine-2-oxoglutarate aminotransferase 1           | K.LVLLGDEVYQQNIYQDERPFISSK.K | 3+ |               | 1 | + |
|                        |    | At1g70580 | Alanine-2-oxoglutarate aminotransferase 2           |                              |    |               |   |   |
| <b>180</b>             | 44 | At1g66200 | ATGSR2: glutamate-ammonia ligase                    | R.TLPGPVTDP SK.L             | 2+ |               | 1 | - |
| <b>181</b>             | 44 | At1g70200 | RNA recognition motif (RRM)-containing protein      | K.RDDNLLK.G                  | 2+ |               | 4 | + |
| <b>182</b>             | 44 | At2g35370 | GDCH (Glycine decarboxylase complex H)              | K.VKPSSPAELESIMGPK.E         | 3+ |               | 1 | - |
| <b>183</b>             | 44 | At4g11010 | Nucleoside diphosphate kinase III                   | R.GLISEIISR.F                | 2+ |               | 1 | - |
| <b>184</b>             | 44 | At4g24770 | RNA-binding protein                                 | R.AEFPEPSEEA.K.L             | 2+ |               | 1 | + |
| <b>185</b>             | 43 | At1g11430 | Plastid developmental protein DAG, putative         | R.DGPPPPEQR.K                | 2+ |               | 4 | - |
| <b>186</b>             | 43 | At1g54100 | Putative aldehyde dehydrogenase                     | R.VGSMVQQTVNAR.S             | 2+ | Oxidation (M) | 1 | + |
| <b>187</b>             | 43 | At3g20250 | APUM5 (ARABIDOPSIS PUMILIO 5)                       | K.LELSDIAGR.V                | 2+ |               | 1 | + |
| <b>188</b>             | 43 | At5g66510 | APUM12 (ARABIDOPSIS PUMILIO 12)                     | K.VLSALSSK.K                 | 2+ | GlyGly (K)    | 1 | + |
|                        |    |           |                                                     | K.KVLSALSSK.K                | 2+ | GlyGly (K)    |   |   |
| <b>189</b>             | 42 | At1g60970 | Clathrin adaptor complex small chain family protein | K.NILLDSEGR.K                | 2+ |               | 2 | + |
|                        |    | At4g08520 | Clathrin adaptor complex small chain family protein |                              |    |               |   |   |
| <b>190<sup>b</sup></b> | 42 | At1g79920 | Heat shock protein 70, putative                     | K.TNVPLSELVYGALK.T           | 2+ |               | 1 | + |
|                        |    | At1g79930 | HSP91 (Heat shock protein 91)                       |                              |    |               |   |   |
| <b>191<sup>b</sup></b> | 42 | At2g37190 | 60S ribosomal protein L12 (RPL12A)                  | K.IGPLGLAPK.K                | 2+ |               | 3 | - |
|                        |    | At3g53430 | 60S ribosomal protein L12 (RPL12B)                  |                              |    |               |   |   |
|                        |    | At5g60670 | 60S ribosomal protein L12 (RPL12C)                  |                              |    |               |   |   |
| <b>192</b>             | 42 | At3g07110 | Structural constituent of ribosome                  | K.VFEGVPTPYDK.I              | 2+ |               | 1 | - |
| <b>193</b>             | 42 | At3g22110 | PAC1 (20S proteasome alpha subunit C1)              | R.TTIFSP EGR.L               | 2+ |               | 2 | - |
| <b>194</b>             | 42 | At3g51600 | Non-specific lipid transfer protein 5               | R.ISYPISAR.T                 | 2+ |               | 3 | - |
| <b>195</b>             | 42 | At5g16130 | 40S ribosomal protein S7-3                          | K.LETMVG VYR.K               | 2+ | Oxidation (M) | 1 | + |
| <b>196</b>             | 41 | At4g24690 | Putative uncharacterized protein F22K18.110         | R.KPVNLNEPTGAH SK.T          | 3+ |               | 1 | + |

Gel pieces; number of gel pieces containing the identified protein

a, b; proteins referenced in (a)Manzano et al. (2008) and (b)Maor et al. (2007)



| Locus     | putative D-box                                                                               | putative KEN-Box | putative PEST motif                                                                                                                                |
|-----------|----------------------------------------------------------------------------------------------|------------------|----------------------------------------------------------------------------------------------------------------------------------------------------|
| At1g02560 | IRDDLO                                                                                       | -                | -                                                                                                                                                  |
| At1g04820 | CRRSL(S)(213-218)                                                                            | -                | -                                                                                                                                                  |
| At1g09100 | AREDL(A)(421-426)                                                                            | -                | -                                                                                                                                                  |
| At1g10840 | QRTNLD(43-48)                                                                                | KENQ(66-60)      | -                                                                                                                                                  |
|           | ARSLF(Q)(5-10)                                                                               | -                | SAGEEPLPEEDPSNPFI(278-292)                                                                                                                         |
|           | SRL(Y)T(328-331)                                                                             | -                | -                                                                                                                                                  |
| At1g11580 | ARDL(K)(210-215)                                                                             | -                | -                                                                                                                                                  |
|           | DRKLE(E)(230-235)                                                                            | -                | -                                                                                                                                                  |
| At1g11910 | ERVQL(K)(31-36)                                                                              | DKENA(365-369)   | -                                                                                                                                                  |
|           | PRGPL(W)(474-479)                                                                            | -                | -                                                                                                                                                  |
| At1g12840 | JRGQL(N)(146-151)                                                                            | -                | -                                                                                                                                                  |
|           | LRSSLL(274-279)                                                                              | -                | -                                                                                                                                                  |
|           | MRYGL(P)(307-312)                                                                            | -                | -                                                                                                                                                  |
|           | VRSILE(I)(330-335)                                                                           | -                | -                                                                                                                                                  |
| At1g20200 | LRQKLT(57-62)                                                                                | -                | -                                                                                                                                                  |
| At1g20260 | ERVTL(F)(232-237)                                                                            | -                | -                                                                                                                                                  |
|           | PRIAL(T)(252-257)                                                                            | -                | -                                                                                                                                                  |
| At1g20620 | -                                                                                            | KKENN(423-427)   | -                                                                                                                                                  |
| At1g21720 | FRHKLY(69-74)                                                                                | -                | -                                                                                                                                                  |
|           | DRDCL(S)(175-180)                                                                            | -                | -                                                                                                                                                  |
| At1g22310 | VRGEL(Y)(22-27)                                                                              | -                | -                                                                                                                                                  |
| At1g24510 | LRSSL(Q)(4-9)                                                                                | KENI(478-482)    | -                                                                                                                                                  |
| At1g28410 | EREKLI(66-71)                                                                                | -                | -                                                                                                                                                  |
|           | QRKHL(P)(185-190)                                                                            | -                | -                                                                                                                                                  |
| At1g29150 | LRKLL(T)(63-68)                                                                              | -                | -                                                                                                                                                  |
|           | KRTFL(R)(118-123)                                                                            | -                | -                                                                                                                                                  |
| At1g30630 | ERDCL(V)(41-46)                                                                              | -                | -                                                                                                                                                  |
|           | LRWLA(Q)(94-99)                                                                              | -                | -                                                                                                                                                  |
| At1g32060 | LRVRL(I)(259-264)                                                                            | -                | -                                                                                                                                                  |
| At1g35160 | -                                                                                            | -                | DNLTLWTSDDMODESPEEI(235-252)                                                                                                                       |
| At1g42970 | NRDPL(K)(159-164)                                                                            | -                | -                                                                                                                                                  |
| At1g45000 | TRVVL(D)(102-107)                                                                            | -                | -                                                                                                                                                  |
| At1g47250 | IRETL(Q)(195-200)                                                                            | -                | -                                                                                                                                                  |
| At1g49240 | KRGIL(T)(63-68)                                                                              | -                | -                                                                                                                                                  |
| At1g50010 | CRRSL(S)(213-218)                                                                            | -                | -                                                                                                                                                  |
|           | AREDL(A)(421-426)                                                                            | -                | -                                                                                                                                                  |
| At1g50200 | LRRLR(L)(377-382)                                                                            | -                | FSSSSSTSSSVAVMPGSEPEIQWPA(36-21)                                                                                                                   |
|           | ERGLL(V)(483-488)                                                                            | -                | -                                                                                                                                                  |
|           | ERRLI(I)(637-642)                                                                            | -                | -                                                                                                                                                  |
| At1g53240 | FRSML(V)(2-7)                                                                                | -                | -                                                                                                                                                  |
|           | TRDDL(F)(114-119)                                                                            | -                | -                                                                                                                                                  |
| At1g54100 | LRSKLD(I)(91-96)                                                                             | -                | -                                                                                                                                                  |
|           | TRIPLV(235-240)                                                                              | -                | -                                                                                                                                                  |
|           | ARSLV(F)(285-290)                                                                            | -                | -                                                                                                                                                  |
|           | CRRL(L)(303-308)                                                                             | -                | -                                                                                                                                                  |
| At1g60970 | BRLLH(H)(304-309)                                                                            | -                | -                                                                                                                                                  |
|           | KREAL(D)(109-114)                                                                            | -                | -                                                                                                                                                  |
|           | AREHL(T)(167-172)                                                                            | -                | -                                                                                                                                                  |
| At1g64520 | ARQML(I)(203-208)                                                                            | -                | -                                                                                                                                                  |
| At1g69740 | GRNLI(V)(45-50)                                                                              | -                | -                                                                                                                                                  |
| At1g70200 | -                                                                                            | -                | SGDSVIVSDDDEEDDEWGEFDGEDEGEEEEEDEGEFLPMD(73-115)/LPYSGLEGDSSADVVEEVLLGSGEEFSDSSEEEVDE(295-330)/LDDQESEFAVETLLNDELGGDEEEVAEDNLEPLNSSLSSSEEN/308-442 |
| At1g70580 | VRGELY(22-27)                                                                                | -                | -                                                                                                                                                  |
| At1g76030 | ERVTL(F)(231-236)                                                                            | -                | -                                                                                                                                                  |
|           | PRIAL(T)(251-256)                                                                            | -                | -                                                                                                                                                  |
| At1g76790 | CRYFL(K)(111-116)                                                                            | -                | -                                                                                                                                                  |
| At1g78900 | KRTVL(V)(310-315)                                                                            | -                | FEDPAEGEDTLVE(690-602)                                                                                                                             |
| At1g79920 | RRAVL(D)(153-158)/ERAKL(K)(476-481)/VRLNLH(484-489)/MRNKL(S)(633-638)                        | -                | DTSDATGTDNGVPESAE(645-661)                                                                                                                         |
| At1g79930 | RRAVL(D)(153-158)/ERAKL(K)(476-481)/VRLNLH(484-489)/MRNKL(S)(633-638)                        | -                | DTSDATGTDNGVPESAE(645-661)                                                                                                                         |
| At2g01250 | QRIAL(T)(159-164)                                                                            | -                | -                                                                                                                                                  |
| At2g04030 | FRSIL(Y)(376-381)/SREIL(Q)(440-445)/MRKRL(I)(453-458)/GRRILE(671-676)                        | -                | SGETVVEPSEV(760-771)                                                                                                                               |
| At2g05840 | ERGPL(L)(146-151)                                                                            | MKENP(163-187)   | -                                                                                                                                                  |
| At2g05990 | DRTL(L)(116-121)                                                                             | -                | -                                                                                                                                                  |
| At2g09990 | DRTL(L)(116-121)                                                                             | -                | -                                                                                                                                                  |
| At2g28000 | SBAAL(Q)(57-62)/RAPLL(L)(287-292)/LRGVL(N)(311-316)/TRCALQ(548-551)                          | -                | -                                                                                                                                                  |
| At2g30200 | MRSLL(H)(-6)/HRTILL(6-11)/VRTSL(S)(20-25)                                                    | -                | -                                                                                                                                                  |
| At2g31610 | VBHVL(L)(172-177)                                                                            | -                | -                                                                                                                                                  |
| At2g33800 | -                                                                                            | -                | ASSTDTEIFFEDETPEITANVFDPPAPEGVSPYPPYDEGSDETEIEIATFEELYGPAYSGESMLG(50-118)                                                                          |
| At2g36160 | GRETL(V)(48-53)                                                                              | -                | JEDVTPIDTST(128-139)                                                                                                                               |
| At2g39730 | NRAPLS(12-17)/KRVQLA(408-413)                                                                | -                | -                                                                                                                                                  |
| At2g42600 | VRRSL(L)(177-182)/RRSL(L)(178-183)/RDCL(T)(188-193)/YRAILG(364-369)/VRDKLY(371-376)/382-287) | -                | -                                                                                                                                                  |
| At2g43160 | GRGGL(Q)(273-378)                                                                            | -                | DGGETPQVTPGAASPPPOVAAPAEASPTGTINTANTITAFVNESPSQ(308-358)/AFTSTDDTSTPQONFASFPPTTAFVNES(463-493)                                                     |
| At2g43750 | ERRVL(L)(174-179)/RRVLLR(175-180)                                                            | -                | YETTGPEIWD(228-239)                                                                                                                                |
| At2g47730 | ARLPL(F)(6-11)                                                                               | -                | -                                                                                                                                                  |
| At3g02090 | RRLFL(T)(15-20)/GRTL(G)(248-253)/GRQLL(T)(465-470)                                           | -                | -                                                                                                                                                  |
| At3g02540 | -                                                                                            | -                | SSSSFAIDSVPASASPTALSPPPP(25-49)                                                                                                                    |
| At3g04840 | GRNLV(L)(93-98)                                                                              | -                | PPPPAPTTPAPVAATETVITPPEVPTATSSSTPAPDSAPVGSQGDVYGOAASNLAAAGSNLESTIQOILDMGGGTWD(125-203)                                                             |
| At3g05560 | VRDWH(R)(2-7)                                                                                | -                | -                                                                                                                                                  |
| At3g11630 | RSSSL(S)(1-5)                                                                                | -                | -                                                                                                                                                  |
| At3g13120 | JRIKL(R)(95-100)                                                                             | -                | VFAVPDTLDPTEILDPEASEVPSSSISVDAD(56-87)                                                                                                             |
| At3g14310 | DRRL(Q)(269-274)                                                                             | -                | -                                                                                                                                                  |

|           |                                                                                                                               |   |   |                                                                        |
|-----------|-------------------------------------------------------------------------------------------------------------------------------|---|---|------------------------------------------------------------------------|
| A13q15950 | TRAKLL(657-662)                                                                                                               | - | - | -                                                                      |
| A13q18780 | KRGILT(63-689)                                                                                                                | - | - | -                                                                      |
| A13q19950 | -                                                                                                                             | - | - | FELPTDDPDYEN(258-269)                                                  |
| A13q20250 | KRNRLD(43-49)JLRNLLK(74-79)IRSSLH(154-159)SRRTAL(161-166)                                                                     | - | - | EEPEDEASSGEGQQSYASLAG(170-189)ETDLSSSDAIASEDPFTDILASQSFTNAOTE(253-283) |
| A13q20820 | DRRALL(24-29)IRRALLA(25-30)FRSALH(31-36)LRNLLI(182-187)SRALLS(202-207)SRNLLQ(278-283)IRACLK(359-364)                          | - | - | -                                                                      |
| A13q22230 | TRYTL(83-88)                                                                                                                  | - | - | -                                                                      |
| A13q22630 | TRGELA(84-89)IRSNLV(161-171)                                                                                                  | - | - | -                                                                      |
| A13q24400 | SRGCLP(156-160)DRGELR(274-279)                                                                                                | - | - | NLAANSSLVEVSGGSEDPSSSSGGGDD(52-81)                                     |
| A13q23090 | CRPLI(274-279)IRRTALV(531-536)                                                                                                | - | - | -                                                                      |
| A13q24503 | ERAKL(82-87)ITRGSLEF(146-151)                                                                                                 | - | - | -                                                                      |
| A13q25530 | MRLALA(240-245)                                                                                                               | - | - | -                                                                      |
| A13q26520 | LBAALA(21-26)JRGILY(102-107)                                                                                                  | - | - | -                                                                      |
| A13q28300 | -                                                                                                                             | - | - | SKENM(4-8)DKEND(139-143)                                               |
| A13q44310 | FRFGLA(75-80)NRMPLY(189-194)YRTALY(194-199)ARAKLY(301-306)                                                                    | - | - | -                                                                      |
| A13q45030 | IRITLS(25-30)DRFELR(83-88)                                                                                                    | - | - | -                                                                      |
| A13q47370 | IRITLS(23-28)DRFELR(81-86)                                                                                                    | - | - | -                                                                      |
| A13q47520 | TRODDF(167-172)                                                                                                               | - | - | -                                                                      |
| A13q51260 | HRLTLE(95-100)JREFLE(170-175)IRALLE(191-196)                                                                                  | - | - | -                                                                      |
| A13q55800 | SRGILP(9-14)JLRTLM(93-98)                                                                                                     | - | - | -                                                                      |
| A13q56910 | NRVSL(45-50)RRRRLV(121-126)                                                                                                   | - | - | -                                                                      |
| A13q58610 | LRDSL(138-143)VRPELR(582-587)                                                                                                 | - | - | -                                                                      |
| A13q60750 | QRSSLP(26-30)TRNLLG(352-357)SRQKLP(597-602)                                                                                   | - | - | ALPTYTPESGDAT(420-433)                                                 |
| A13q60920 | DRAVLS(54-59)                                                                                                                 | - | - | -                                                                      |
| A13q61820 | QRDSL(88-93)GRGGLS(265-270)                                                                                                   | - | - | -                                                                      |
| A13q63140 | HRESLP(29-34)                                                                                                                 | - | - | -                                                                      |
| A13q64640 | FRSVLK(26-31)                                                                                                                 | - | - | -                                                                      |
| A13q68520 | AREHLA(171-176)ARSLT(176-181)                                                                                                 | - | - | -                                                                      |
| A13q14800 | TRGELA(84-89)IRSNLV(166-171)                                                                                                  | - | - | -                                                                      |
| A13q14880 | RRILL(105-110)                                                                                                                | - | - | -                                                                      |
| A13q14960 | CRRSLN(213-218)ARFEDA(421-426)                                                                                                | - | - | -                                                                      |
| A13q15000 | TRYTL(83-88)                                                                                                                  | - | - | -                                                                      |
| A13q19006 | TRINL(68-73)                                                                                                                  | - | - | -                                                                      |
| A13q24690 | TRPKL(372-377)SRFVLD(378-383)                                                                                                 | - | - | EKENL(554-558)                                                         |
| A13q24770 | GRINLP(48-53)SRVSL(57-62)                                                                                                     | - | - | SPFVFAQTSQDWAEEGEGSVAVEETENSLESQQVSEGESEGDASEGVSEGESEQDVEGAVSE(72-139) |
| A13q24920 | DRVSLK(230-235)                                                                                                               | - | - | -                                                                      |
| A13q27150 | -                                                                                                                             | - | - | AAEDPAPASSS(45-56)                                                     |
| A13q31300 | VRVYELH(71-76)                                                                                                                | - | - | -                                                                      |
| A13q38510 | ERVTLF(232-237)PRIALT(252-257)                                                                                                | - | - | -                                                                      |
| A13q02870 | ERLNL(240-245)KRAVLK(317-322)                                                                                                 | - | - | -                                                                      |
| A13q04140 | TRRRL(42-47)ARETL(898-903)LRDLE(969-974)ERVILR(1224-1229)OREELR(1281-1286)VRGILA(1307-1312)GRTELL(1324-1329)VRNSLA(1511-1516) | - | - | KENS(555-559)                                                          |
| A13q04590 | IRYPLN(82-92)NRNVA(202-207)                                                                                                   | - | - | -                                                                      |
| A13q10540 | ARQRLV(131-136)YRAYLS(249-254)HRDRLM(525-530)                                                                                 | - | - | -                                                                      |
| A13q10860 | HREELQ(191-196)                                                                                                               | - | - | -                                                                      |
| A13q14320 | SRNTLA(26-31)ARQILV(76-81)                                                                                                    | - | - | -                                                                      |
| A13q14740 | HRLSL(39-44)                                                                                                                  | - | - | -                                                                      |
| A13q16130 | TRYRLD(141-146)                                                                                                               | - | - | -                                                                      |
| A13q18380 | DRTLLV(116-121)                                                                                                               | - | - | -                                                                      |
| A13q19440 | ERHLF(58-63)GRYCLV(249-254)                                                                                                   | - | - | TPDVTVDWTFWSPPELCEAS(142-161)                                          |
| A13q19990 | TRVALR(124-129)                                                                                                               | - | - | -                                                                      |
| A13q20000 | TRVALR(124-129)                                                                                                               | - | - | -                                                                      |
| A13q23540 | -                                                                                                                             | - | - | AVOEEDLSPE(267-267)                                                    |
| A13q25980 | LRSSLP(532-537)DRKSLT(542-547)                                                                                                | - | - | PEEETCEENVPFTCSQYTD(30-48)                                             |
| A13q26000 | DRKSLA (534-539)                                                                                                              | - | - | -                                                                      |
| A13q35590 | -                                                                                                                             | - | - | MKENP (183-187)                                                        |
| A13q37510 | KRQRLS(340-345)WRDAL(361-366)                                                                                                 | - | - | PELQSPESAASVEPEPTQILPP(34-56)                                          |
| A13q42790 | SREDL(183-188)VRTELQ(195-200)                                                                                                 | - | - | -                                                                      |
| A13q43010 | TRVVD(102-107)                                                                                                                | - | - | -                                                                      |
| A13q48300 | VRQYLW(193-198)                                                                                                               | - | - | -                                                                      |
| A13q52840 | TRKKLN(331-336)SRETLO(376-381)                                                                                                | - | - | KKENE(233-237)                                                         |
| A13q52960 | RRKPLT(53-58)                                                                                                                 | - | - | EISDDEDEPE (222-232)JLGLSIDENVEEDGMPLEEDAEES(672-699)                  |
| A13q56000 | SRETLO(370-375)                                                                                                               | - | - | -                                                                      |
| A13q56010 | SRETLO(370-375)                                                                                                               | - | - | LGLSIEDDAVEADAEMPLEDDADAEGS(665-693)                                   |
| A13q56510 | QRKLC(158-163)GRWLQ(246-251)                                                                                                  | - | - | LGLSIDDDVVEADAEMPLEDDADAEGS(665-693)                                   |
| A13q58200 | NRKLL(110-115)                                                                                                                | - | - | -                                                                      |
| A13q60600 | IRVSLT(341-346)YRNVLH(404-409)ARLAK(465-470)HRDELV(585-590)                                                                   | - | - | YSLTEPPEEIDPC(343-356)                                                 |
| A13q62300 | IRITLS(25-30)DREELR(83-88)                                                                                                    | - | - | -                                                                      |
| A13q63310 | FRTALA(37-42)SRRLR(57-62)                                                                                                     | - | - | -                                                                      |
| A13q65620 | SRASLN(8-13)ARQRLV(219-224)YRAYLS(337-342)HRDRLM(613-618)                                                                     | - | - | ESPDWSSLS(209-219)                                                     |
| A13q66140 | HRLTLE(95-100)JREFLE(170-175)IRALLE(191-196)                                                                                  | - | - | -                                                                      |
